# Supplementary material
Source: PubMed Central journal article supplement (PMC6800167)
Supplement: NIHMS1021114-supplement-Supplementary_information.pdf [file NIHMS1021114-supplement-Supplementary_information.pdf]

# Fluorescent 5-Pyrimidine and 8-Purine Nucleosides Modified with *N*-unsubstituted 1,2,3-Triazol-4-yl Moiety

Zhiwei Wen, Paloma R. Tuttle, A. Hasan Howlader, Anna Vasilyeva, Laura Gonzalez, Antonija Tangar, Ruipeng Lei, Eduardo E. Laverde, Yuan Liu, Jaroslava Miksovska, Stanislaw F. Wnuk\*

Department of Chemistry and Biochemistry, Florida International University, Miami, FL 33199, USA

Corresponding authors: [wnuk@fiu.edu](mailto:wnuk@fiu.edu)

## SUPPORTING INFORMATION

### Contents

|                                                                                           |     |
|-------------------------------------------------------------------------------------------|-----|
| 1. Mechanism for the formation of <i>N</i> -unsubstituted 1,2,3-triazoles .....           | S2  |
| 2. Fluorescent Characterization.....                                                      | S2  |
| 3. Polymerase-catalyzed incorporation of 9 into DNA.....                                  | S5  |
| 4. <sup>1</sup> H, <sup>13</sup> C, <sup>19</sup> F and <sup>31</sup> P NMR spectra ..... | S7  |
| 5. References.....                                                                        | S23 |

## 1. Mechanism for the formation of *N*-unsubstituted 1,2,3-triazoles

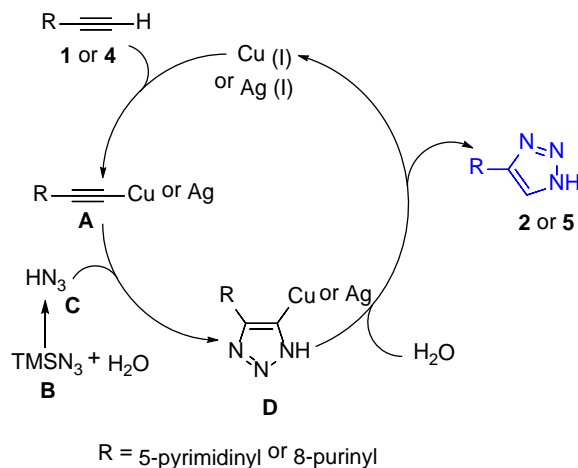

**Figure S1.** Mechanism for the formation of *N*-unsubstituted 1,2,3-triazoles

Likely terminal alkyne **1** or **4** reacts with Cu(I) or Ag(I) forming metal activated alkyne **A**, which further reacts with hydrazoic acid **C**, generated in-situ from  $TMSN_3$  and  $H_2O$ , to produce intermediate **D**. Protonation of **D** yields the final *N*-unsubstituted 1,2,3-triazol-4-yl product **2** or **5** and releases Cu(I) or Ag(I) as catalyst.

## 2. Fluorescent Characterization

The fluorescent properties of the four *N*-unsubstituted triazolyl nucleosides (8-TrzdA **2a**, 8-TrzdG **2c**, 5-TrzdC **5b**, and 5-TrzdU **5d**) and their lipophilic protected analogs (3',5'-di-*O*-TBDMS-8-TrzdA **2b**, 3',5'-di-*O*-Ac-5-TrzdU **5c**, and 3',5'-di-*O*-5-TrzdC **5a**) were determined following the procedure reported by our group.<sup>S1</sup> Triazoles samples were tested with varying concentration in MeOH and other solvents specified in Table S2. The absorbance at the excitation wavelength did not exceed 0.1 absorbance units. For determination of quantum yield  $\Phi_F$ , the absorbance of the sample solution was kept below 0.06. Quinine sulfate ( $\Phi_F = 0.55$ ) in 100 mM  $H_2SO_4$  was used as reference standard to quantify the quantum yield. The test was performed in a  $2 \times 10$  mm quartz cuvette at room temperature. Absorption spectra were measured using Cary 100Bio UV-Visible Spectrophotometer. Steady-state excitation and emission spectra were

investigated on a PC1 spectrofluorometer with bandwidth and slit width for ex/em set at 2 nm. Frequency-domain fluorescence lifetime were measured using a ChronosFD spectrofluorometer. Sample solutions were excited using a frequency modulated 280 nm LED. The emission was gathered with a 305 nm long-pass filter (Andover). 2,5-diphenyloxazole ( $\tau = 1.4$  ns) solution in EtOH was employed as a lifetime reference. A multiple-exponential decay model employing GlobalsWE software were used to fit the modulation phase data. The residual and  $\chi^2$  parameter were employed as criteria for goodness of fit.

**Table S1.** Photophysical data for the protected triazolyl nucleoside analogs in MeOH

|                                                | <b>2b</b> | <b>5a</b> | <b>5c</b> |
|------------------------------------------------|-----------|-----------|-----------|
| $\epsilon_{\max}$ ( $M^{-1} \text{ cm}^{-1}$ ) | 14100     | 4150      | 10700     |
| $\lambda_{\max}$ (abs) (nm)                    | 285       | 293       | 291       |
| $\lambda_{\max}$ (exc) (nm)                    | 232       | 259       | 239       |
| $\lambda_{\max}$ (exc) (nm)                    | 292       | 312       | 294       |
| $\lambda_{\max}$ (emi) (nm)                    | 355       | 421       | 400       |
| Stokes shift (nm)                              | 63        | 109       | 109       |
| $\Phi_F$                                       | 0.48      | 0.02      | 0.003     |
| $\tau_1$ (ns)                                  | 1.01      | 0.46      | 0.05      |
| $\tau_2$ (ns)                                  | 2.82      | 4.48      | 1.59      |
| $\tau_{\text{average}}$ (ns)                   | 2.22      | 4.20      | 0.82      |
| $f_1$ (%)                                      | 33        | 7         | 50        |
| $f_2$ (%)                                      | 67        | 93        | 50        |

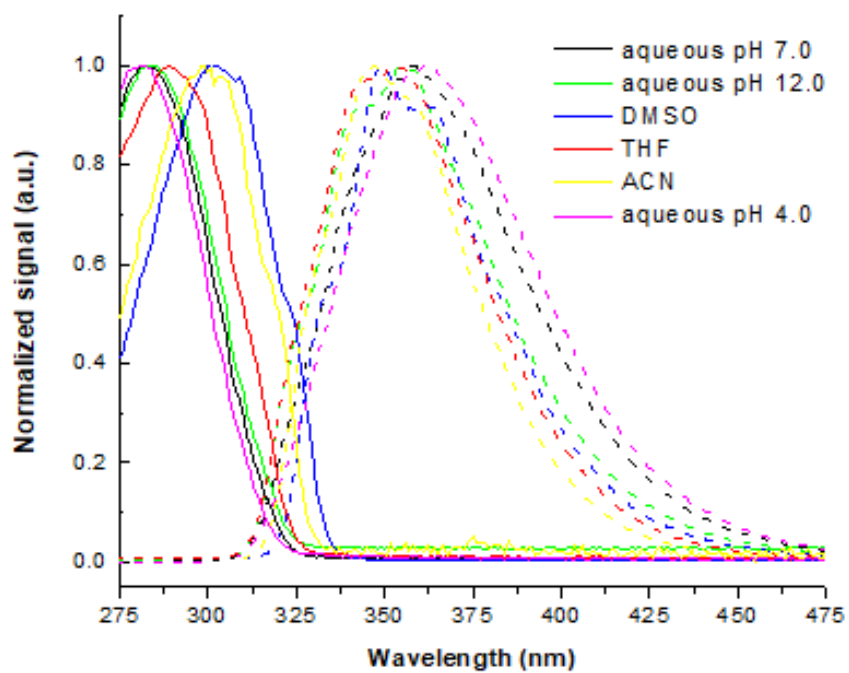

**Figure S2.** Absorption (solid line) and emission (dash line) spectra for compound **2a** in different solvents

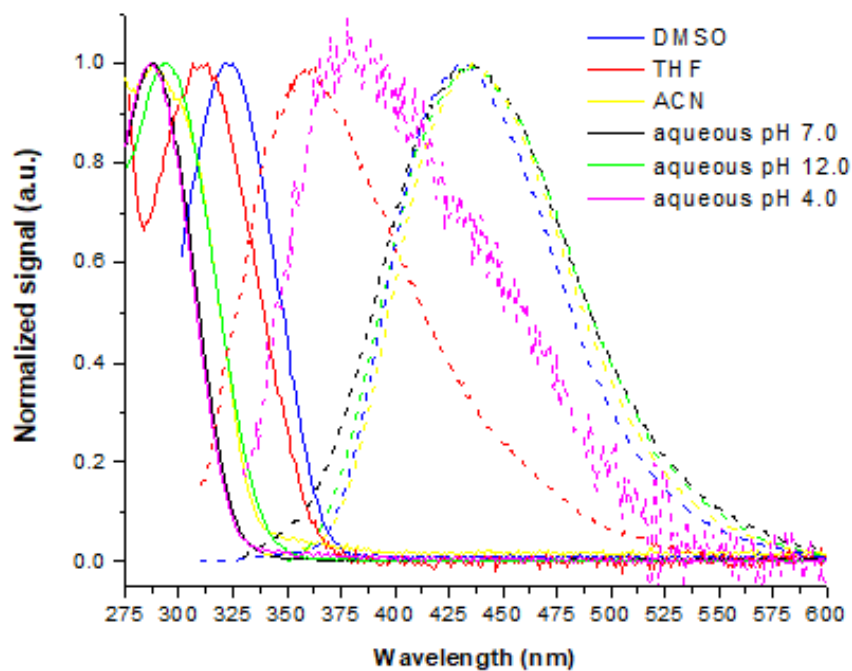

**Figure S3.** Absorption (solid line) and emission (dash line) spectra for compound **5b** in different solvents.

Relatively high S/N ratio for **5b** in aqueous solution pH 4.0 is due to the low emission quantum yield.

**Table S2.** Photophysical data for **2a** and **5b** in various solvents

|           |                            | 5 mM Phosphate buffer |          |           | MeOH | DMSO | THF | ACN |
|-----------|----------------------------|-----------------------|----------|-----------|------|------|-----|-----|
|           |                            | pH = 4.0              | pH = 7.0 | pH = 12.0 |      |      |     |     |
| <b>2a</b> | $\lambda_{max}^{abs}$ (nm) | 281                   | 283      | 284       | 287  | 300  | 289 | 299 |
|           | $\lambda_{max}^{em}$ (nm)  | 361                   | 358      | 355       | 355  | 350  | 353 | 349 |
| <b>5b</b> | $\lambda_{max}^{abs}$ (nm) | 287                   | 289      | 293       | 295  | 322  | 289 | 300 |
|           | $\lambda_{max}^{em}$ (nm)  | 378                   | 435      | 433       | 407  | 432  | 359 | 435 |

### 3. Polymerase-catalyzed incorporation of **9** into DNA

#### Material for Enzymatic Reactions

All DNA oligonucleotide templates and primers were synthesized by Integrated DNA Technologies (IDT) (Coralville, IA). T4 polynucleotide kinase was purchased from Thermo Fisher Scientific (Waltham, MA, USA). Radionucleotides [<sup>32</sup>P] ATP (3000 Ci/mmol) was purchased from Perkin Elmer Inc. (Boston, MA, USA). Micro Bio-Spin TM 6 Columns were purchased from Bio-Rad (Hercules, CA). All other chemicals used were purchased from Sigma-Aldrich (St. Louis, MO) and Thermo Scientific (Pittsburgh, PA). Recombinant human DNA polymerase  $\beta$  (pol  $\beta$ ) was expressed and purified as described previously.<sup>S2</sup>

#### Oligonucleotide Substrates

**Table S3.** Oligonucleotide Sequences

| Oligonucleotide | nt | Sequence (5'-3')                                                             |
|-----------------|----|------------------------------------------------------------------------------|
| Upstream        | 33 | GCAGTCCTCTAGTCGTAGTAGCAGATCATCAAC                                            |
| Downstream      | 37 | GCCGGCATTAGGTGTAGTAGCTAGACTTACTCATTGC                                        |
| Template strand | 71 | GCAATGAGTAAGTCTAGCTACTACACCTAATGCCGGCTGTTGATGATC<br>TGCTACTACGACTAG AGGACTGC |

The one nucleotide gap substrate was constructed by annealing the 5'-<sup>32</sup>P-labeled upstream strand and the downstream strand containing a 5'-phosphate group with the template strand at a molar ratio of 1:2:2. The sequences of the oligos for constructing the substrate are listed in Table S3.

### Enzymatic Activity Assay.

The incorporation of 8-TrzdATP **9** by human DNA polymerase was performed by incubating different concentrations of pol β with 5 nM <sup>32</sup>P-labeled substrates at 37 °C for 30 min as described previously.<sup>S3-4</sup> The enzymatic reactions were assembled in the presence of 8-TrzdATP (100 μM). The extension of an incorporated 8-TrzdATP was examined in the presence of both 100 μM 8-TrzdATP and 50 μM dGTP in the different concentrations of pol β. The experiments were repeated three times. The use of one nucleotide gap allow us to examine whether 8-TrzdATP can be incorporated into duplex DNA. The substrate was from pol β DNA synthesis product by a 15% urea-denaturing polyacrylamide gel through electrophoresis and detected by a Pharos FX Plus PhosphorImager (Bio-Rad Laboratory, Hercules, CA).

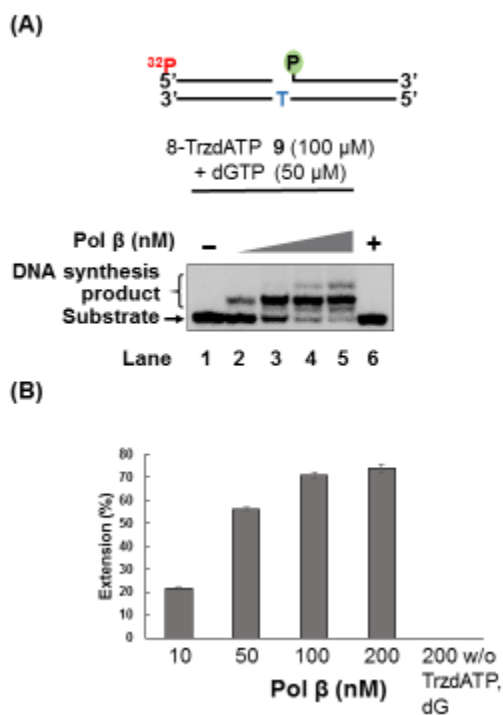

**Figure S4.** (A) The extension of an incorporated 8-TrzdATP **9** by pol β. The reaction was assembled in the reaction buffer containing the substrate, 100 μM 8-TrzdATP, and 50 μM dGTP along with different concentrations of pol β. Substrates was <sup>32</sup>P-labeled at the 5'-end of the upstream strand of the substrate as illustrated above the gel. Lane 1 indicates substrate only. Lanes 2-5 indicates DNA synthesis product at increasing concentrations of pol β (10 nM - 200 nM), respectively. Lane 6 indicates the reaction mixture with pol β without any nucleotides. (B) Bar chart illustrating the quantification of the pol β DNA synthesis product.

#### 4. $^1\text{H}$ , $^{13}\text{C}$ , $^{19}\text{F}$ and $^{31}\text{P}$ NMR spectra

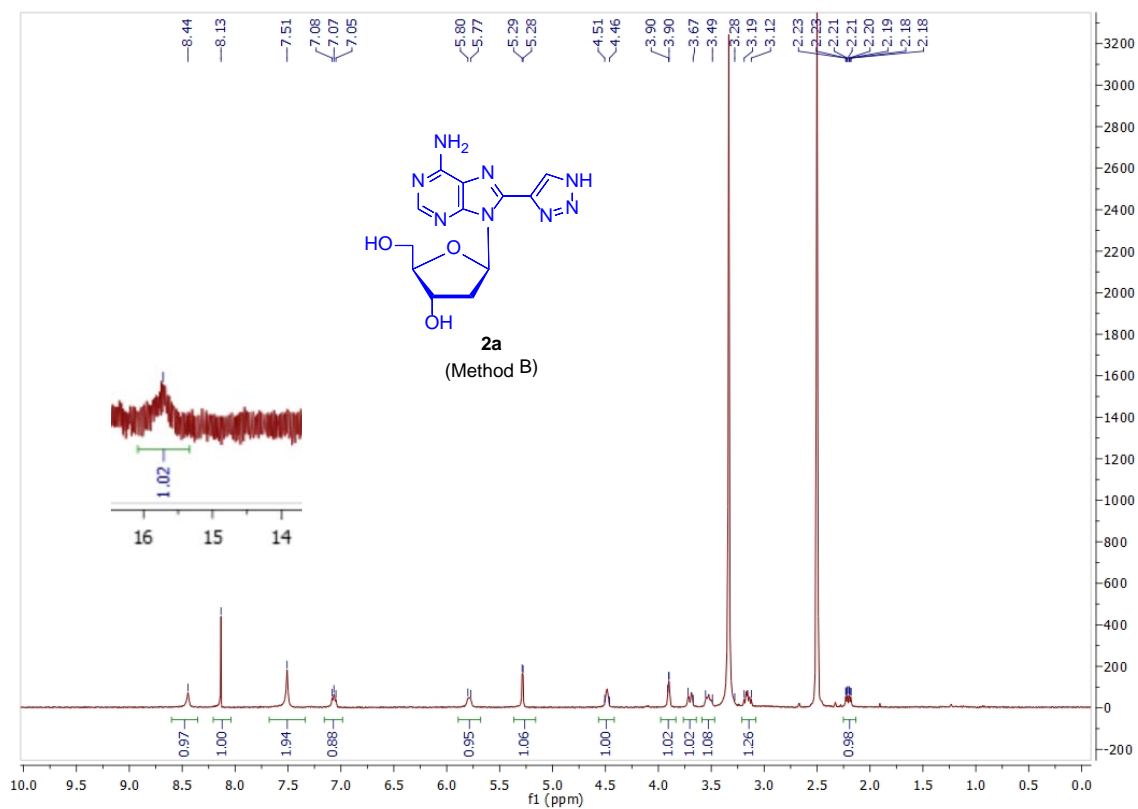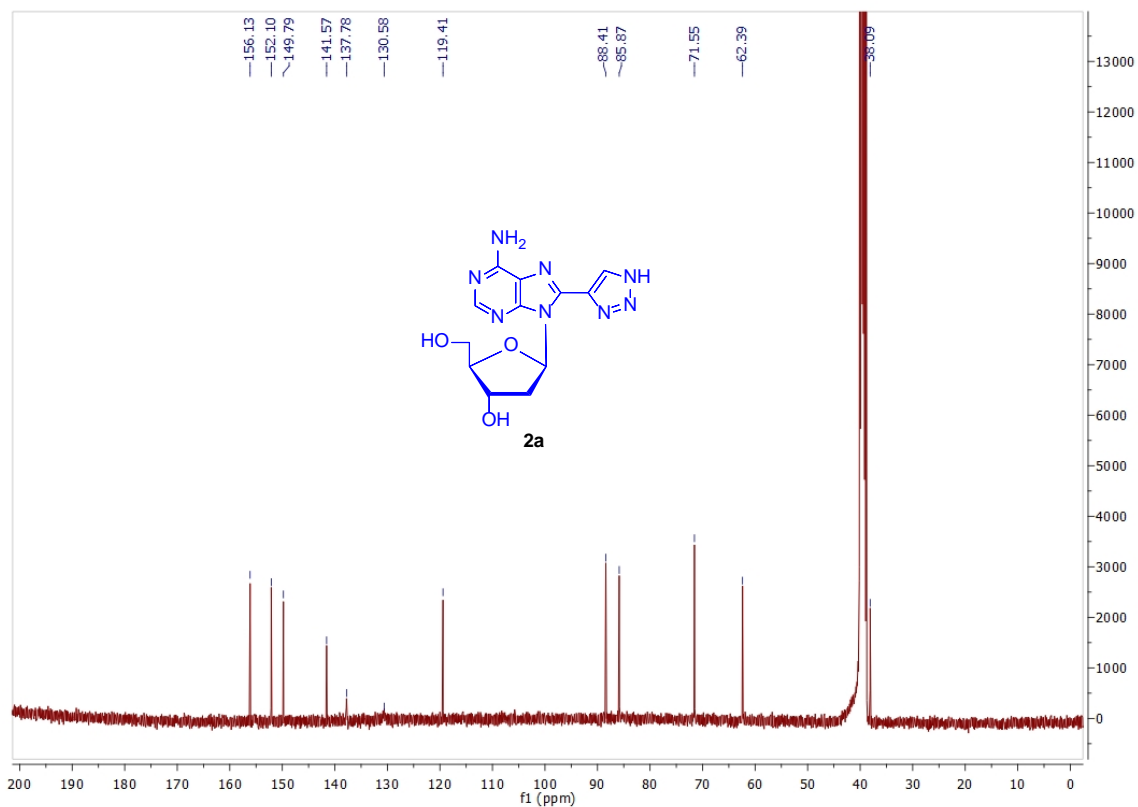

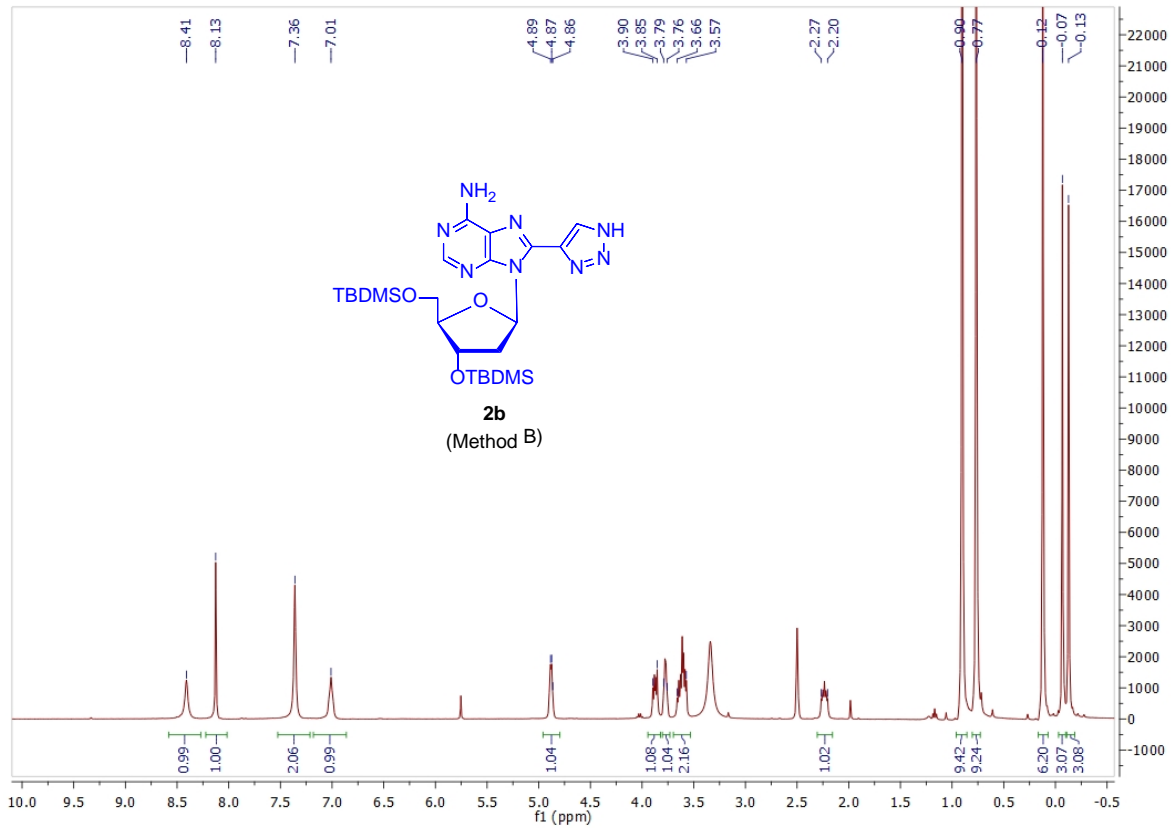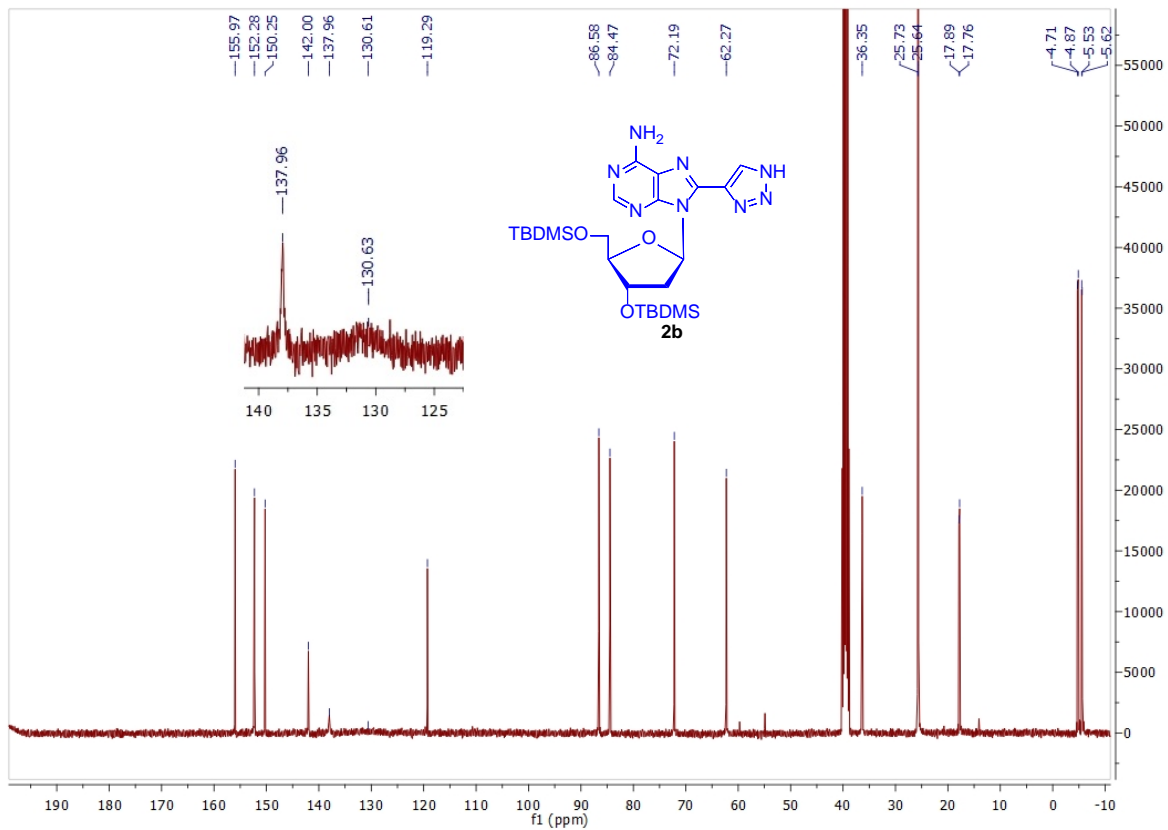



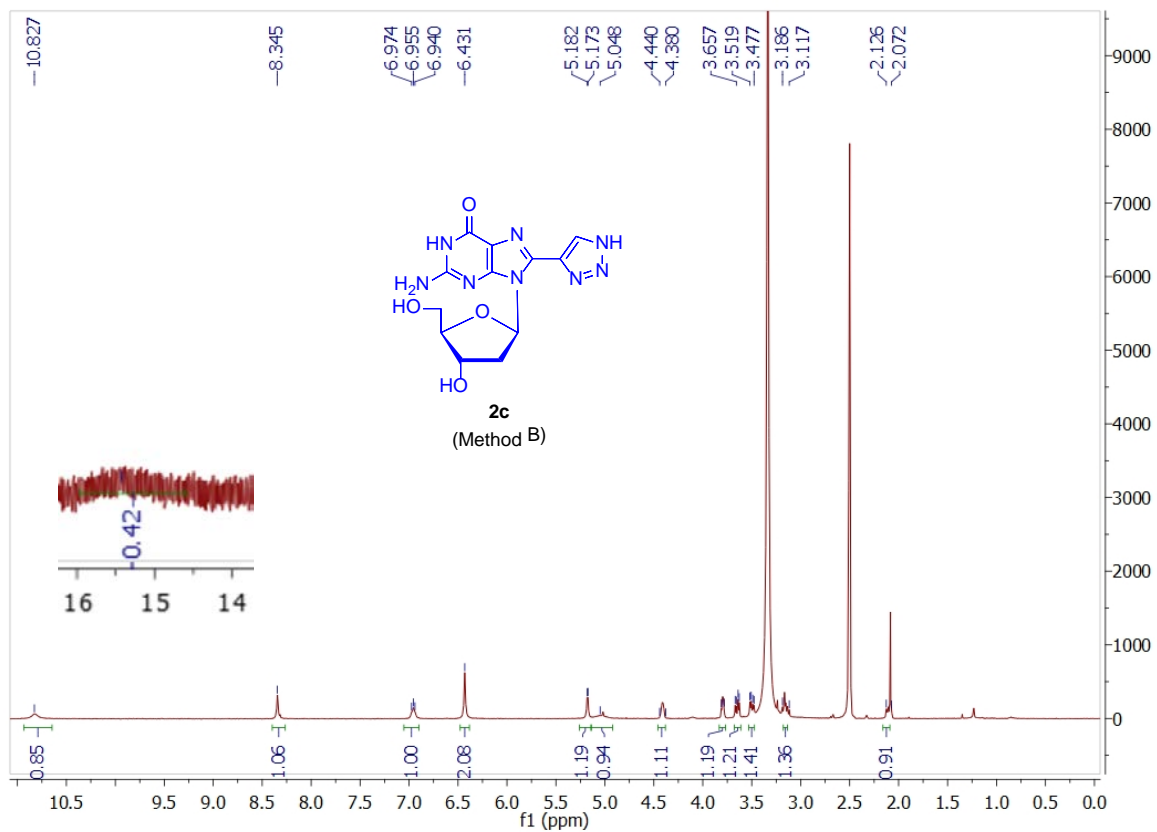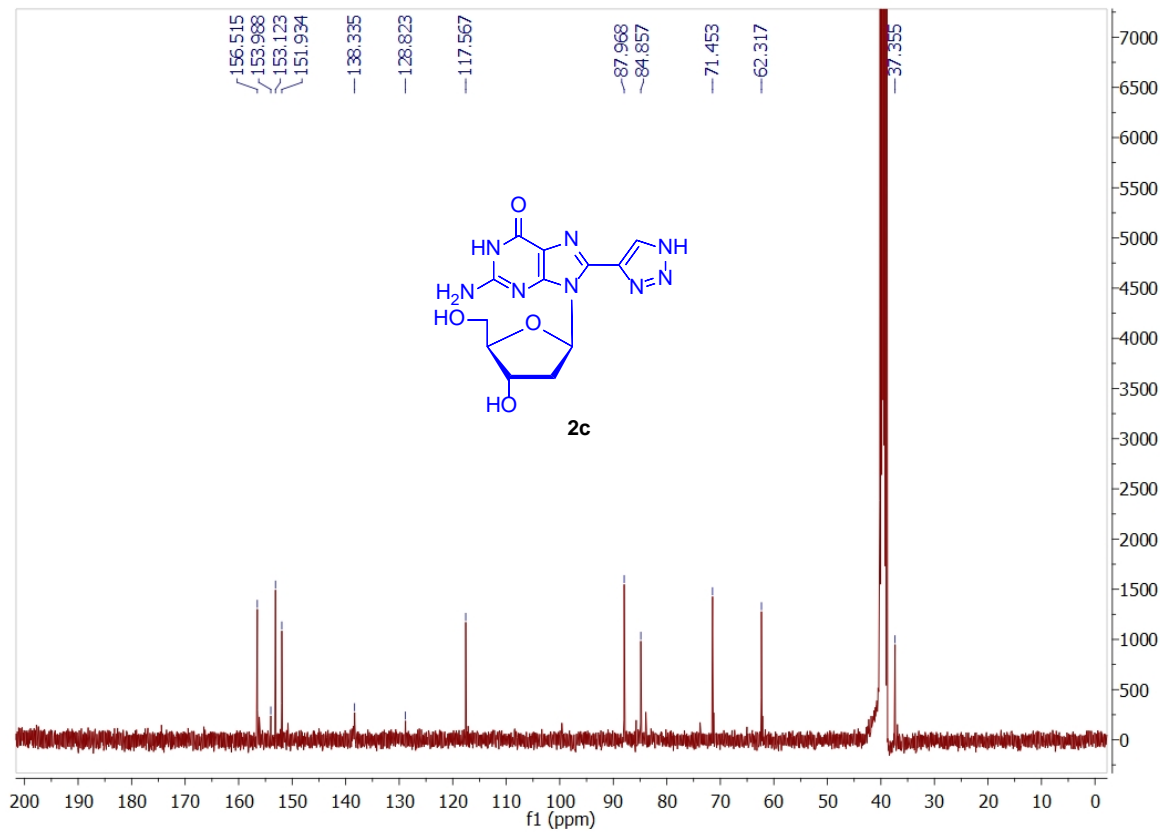

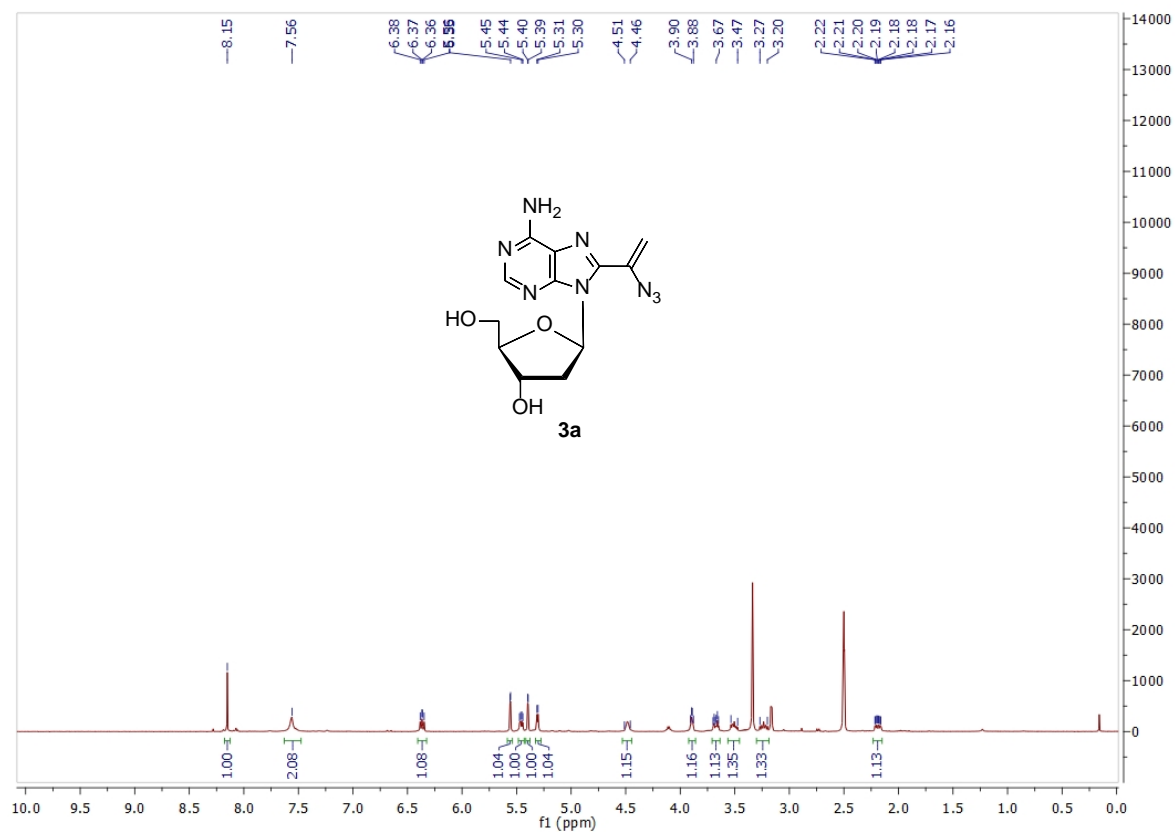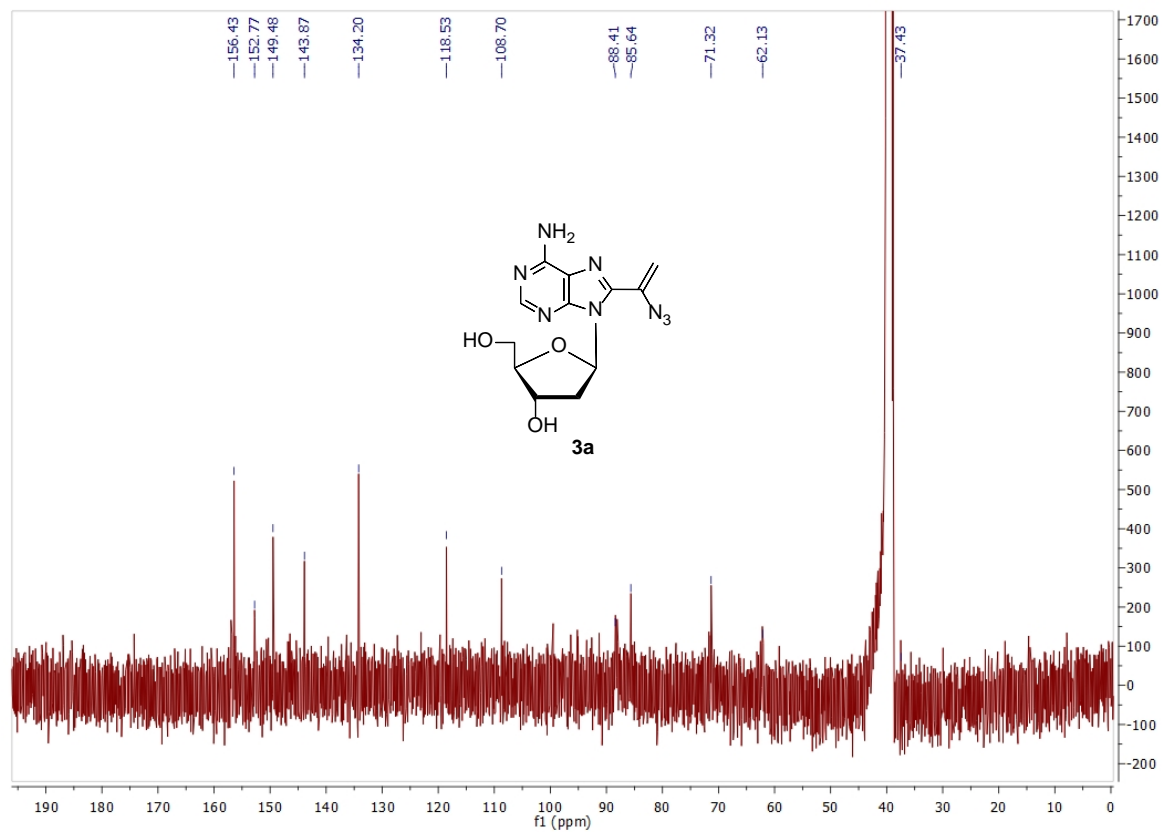

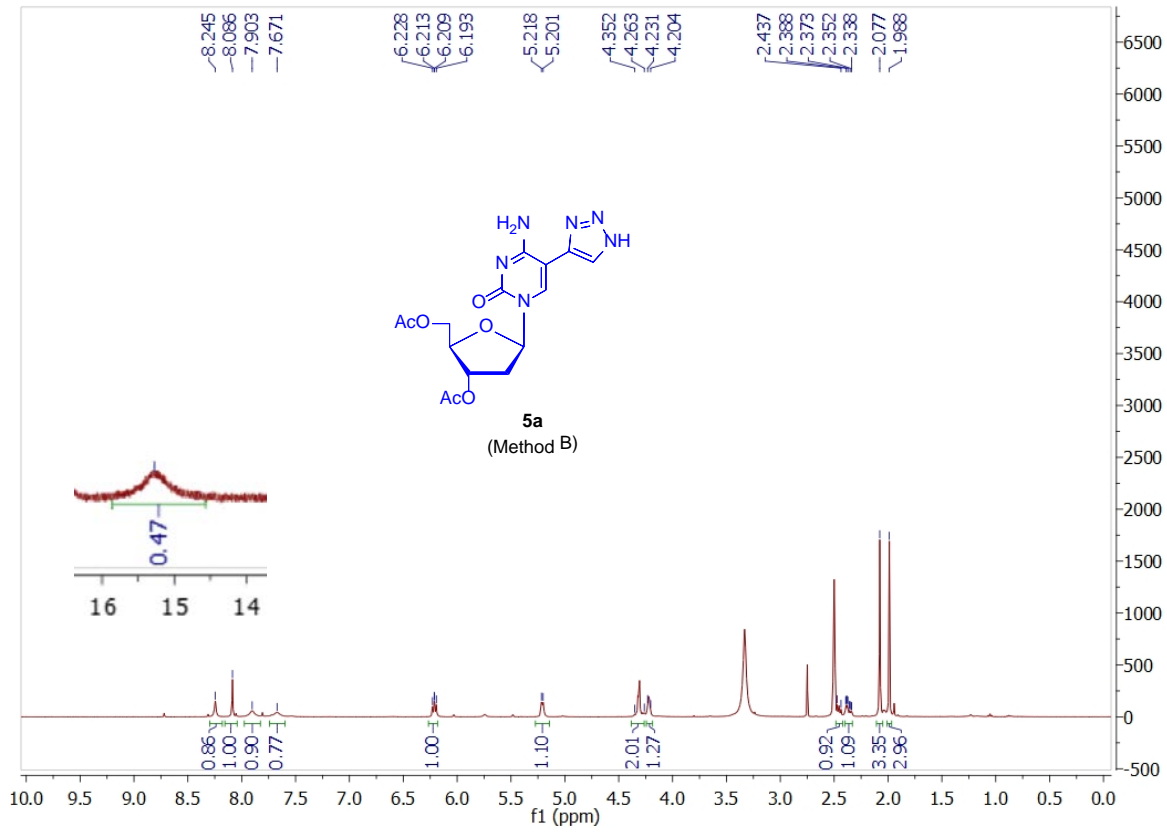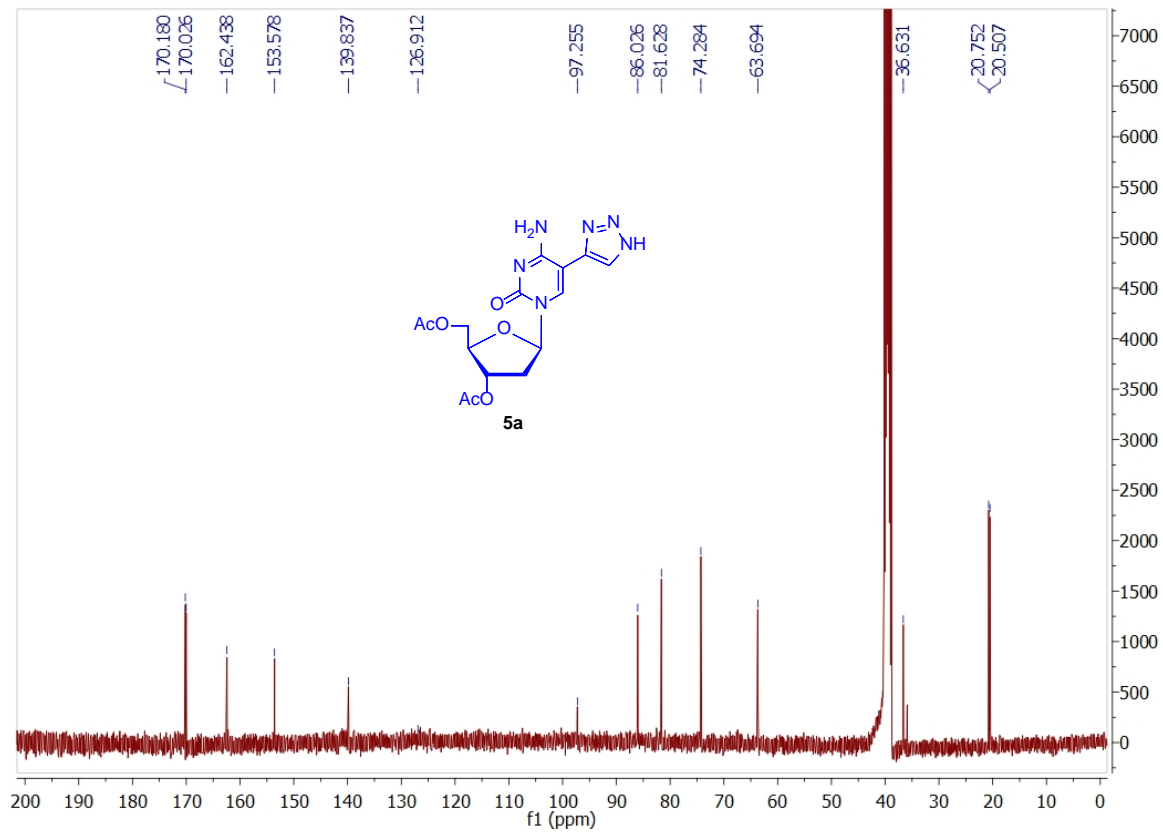

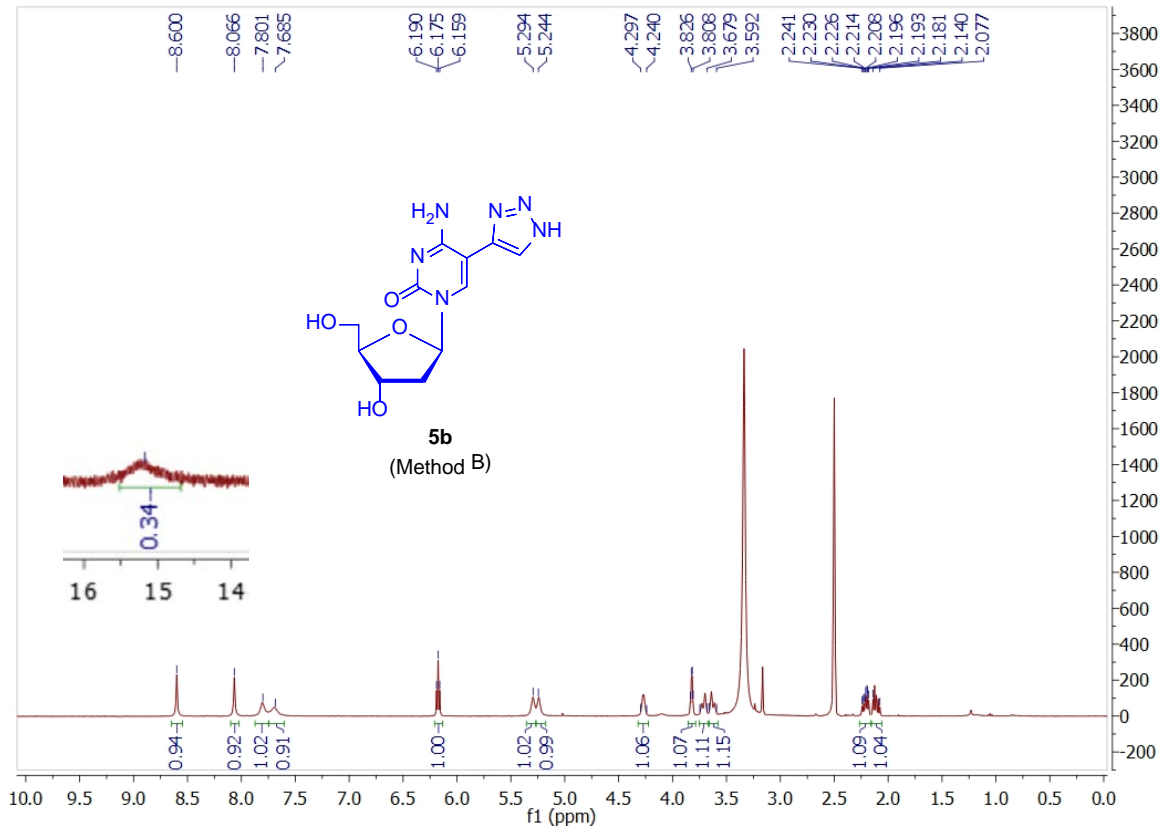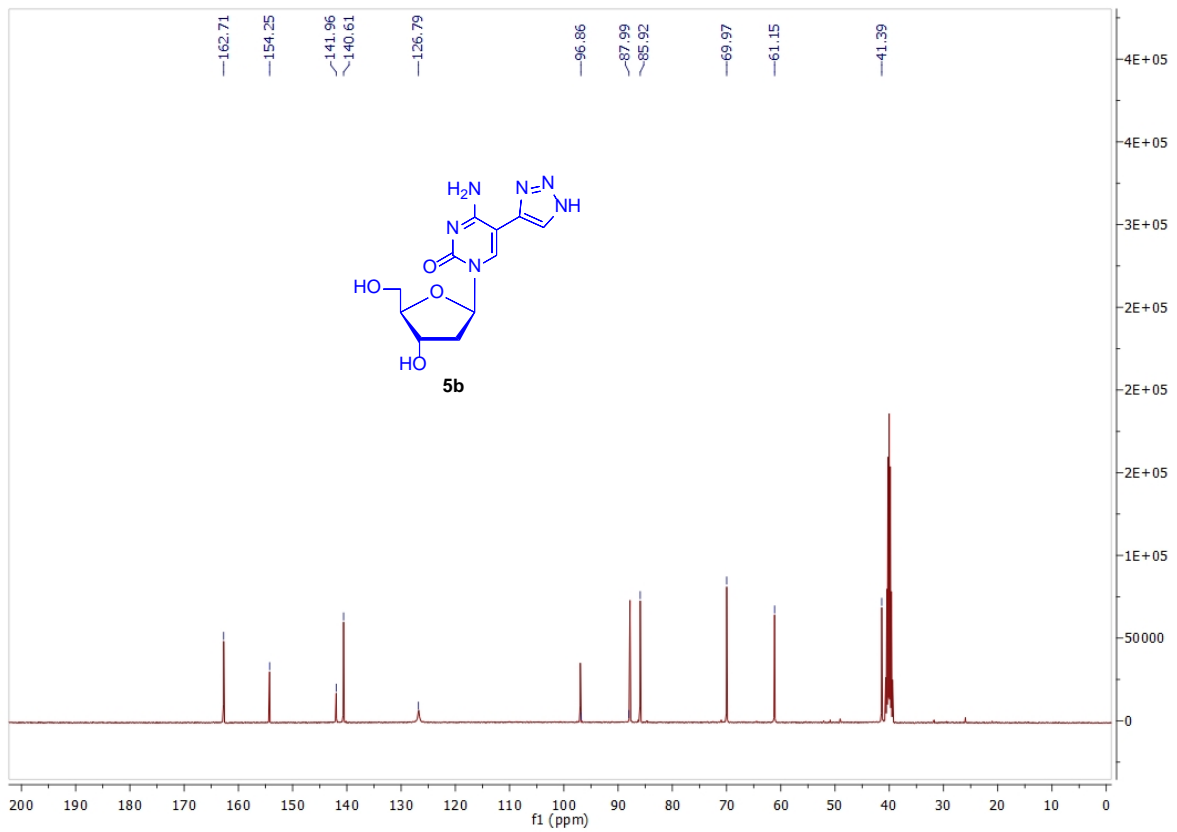

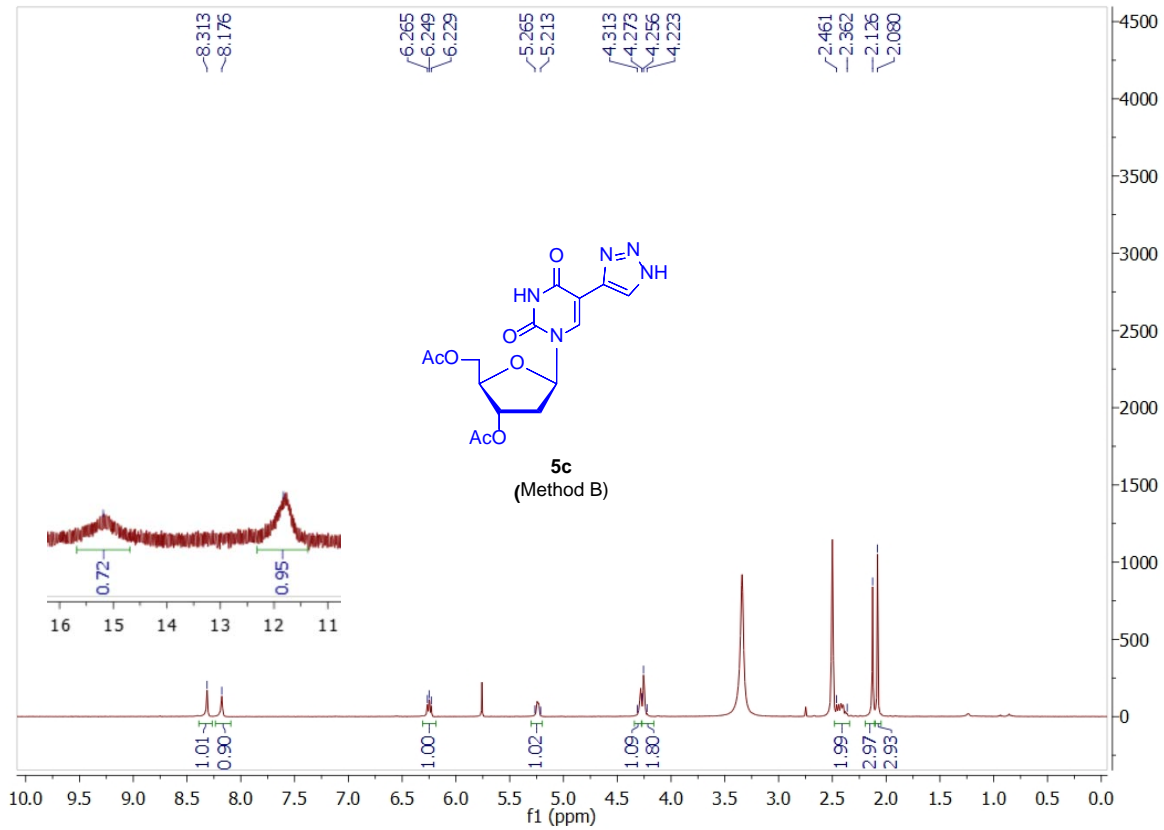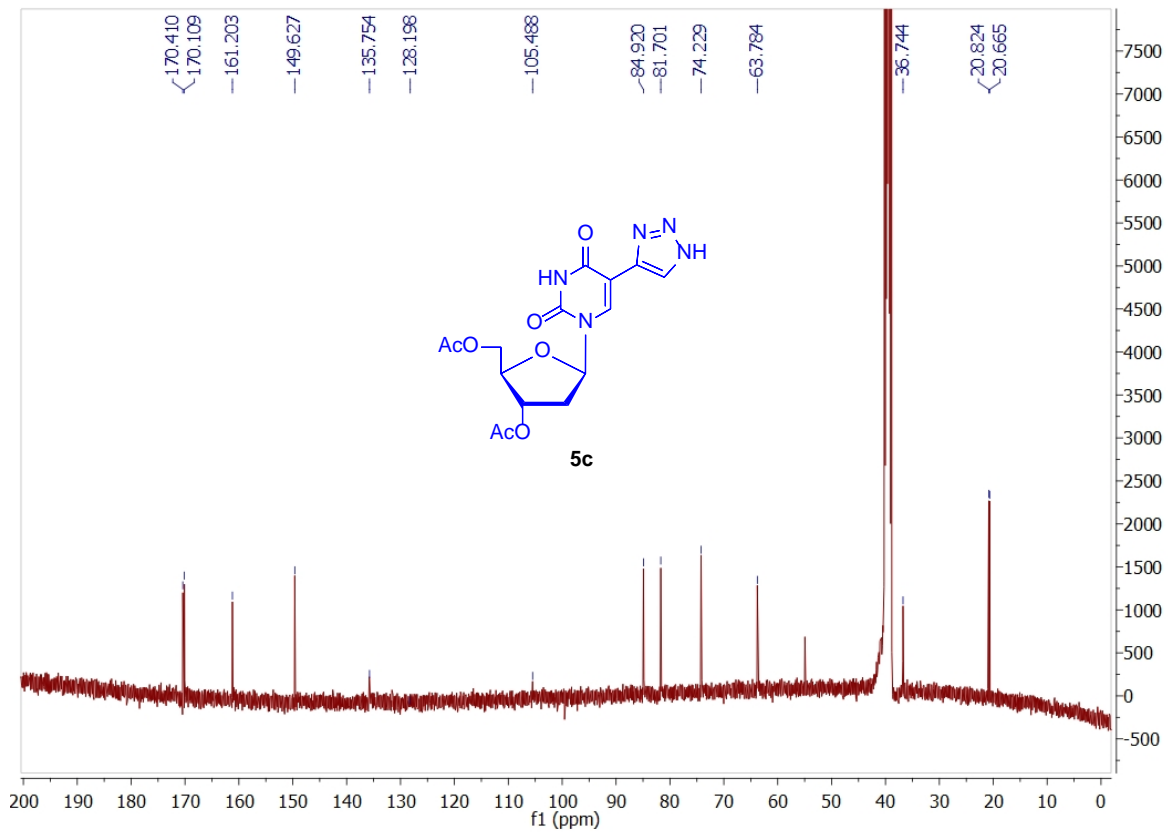

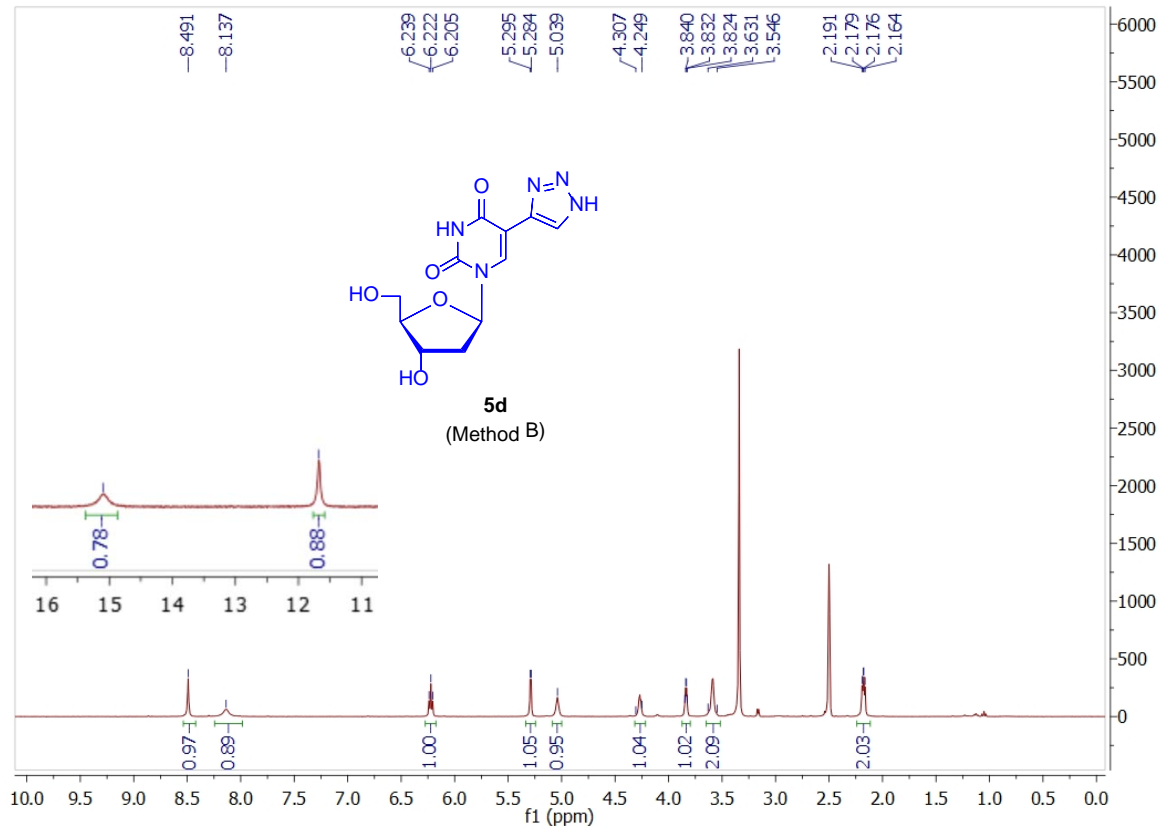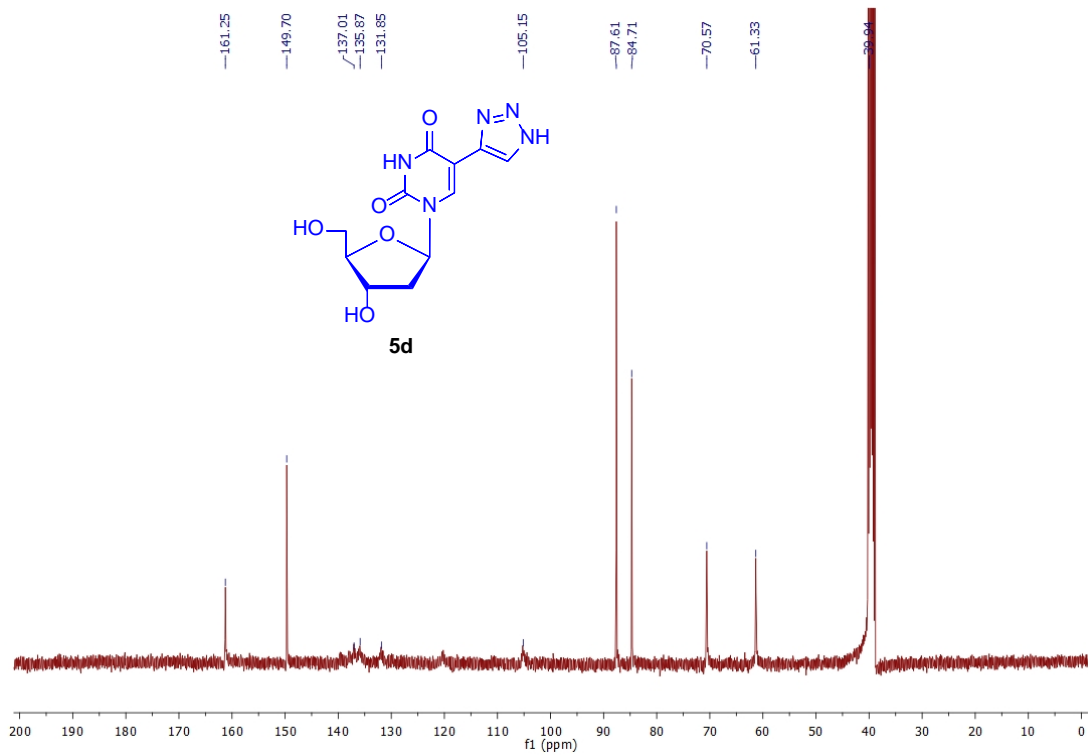

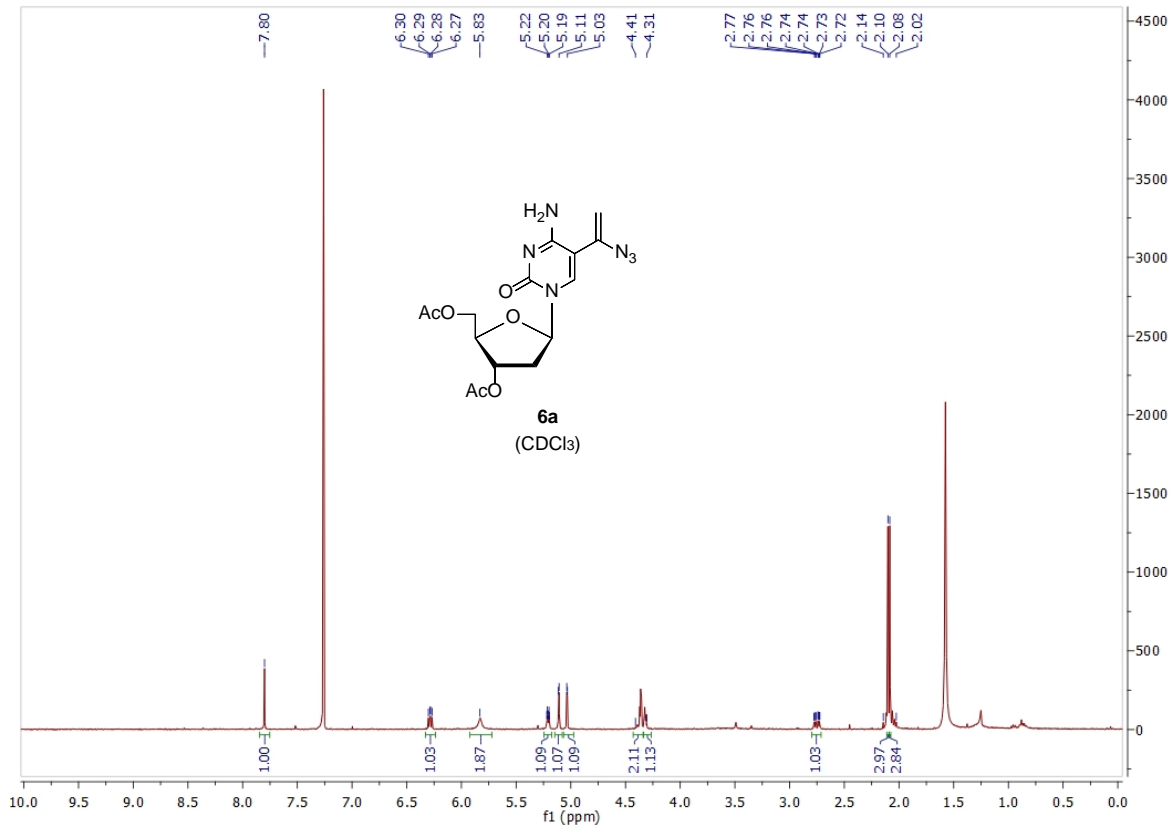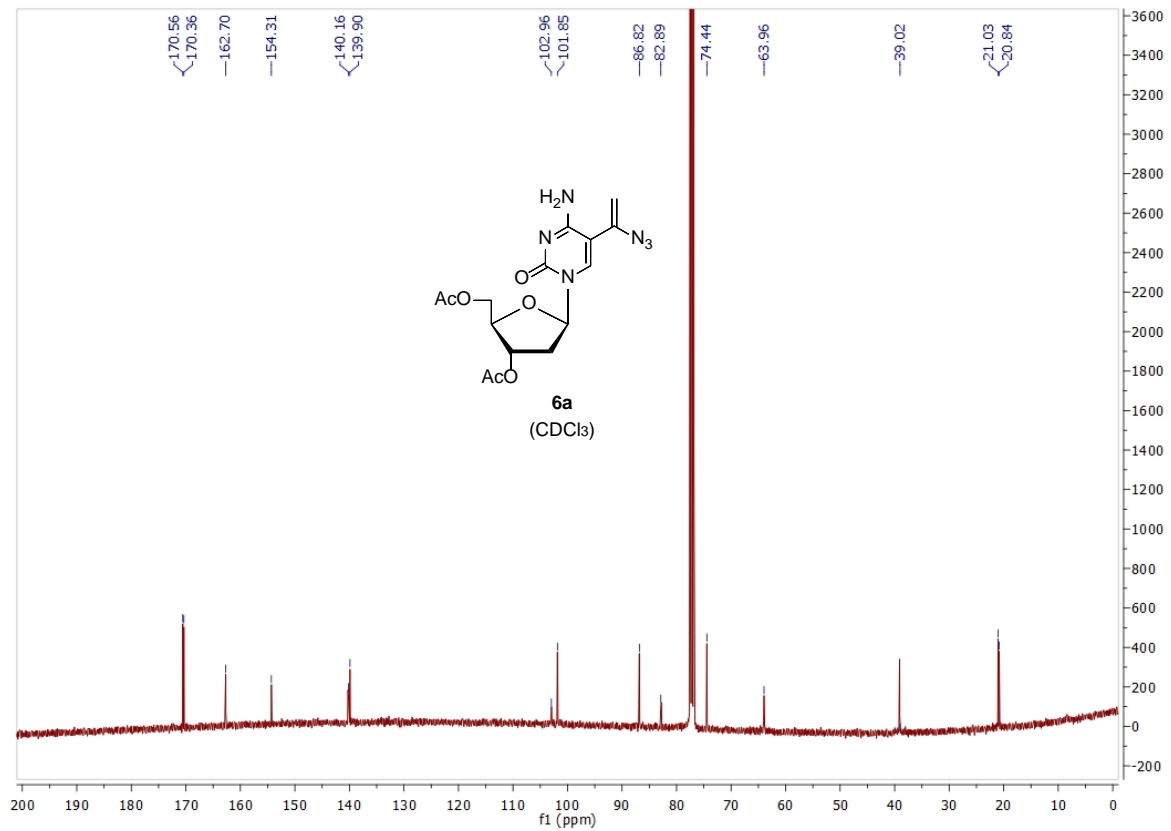

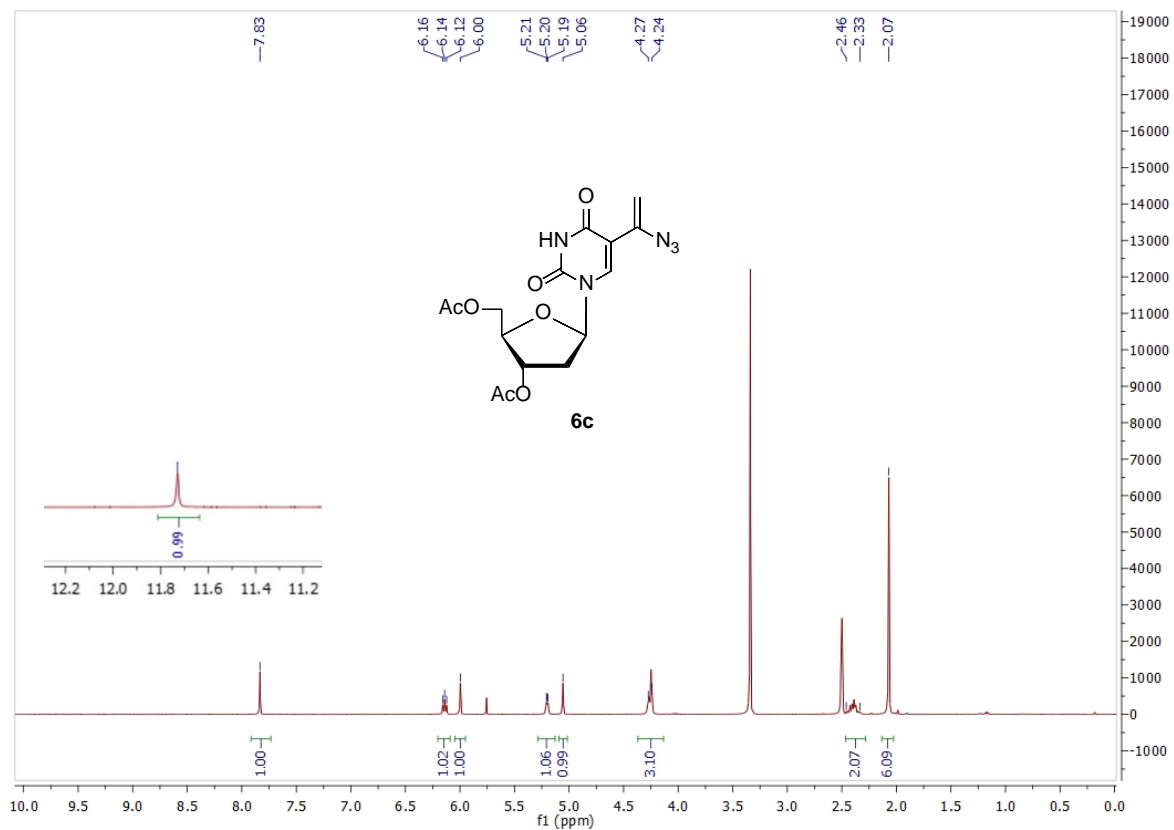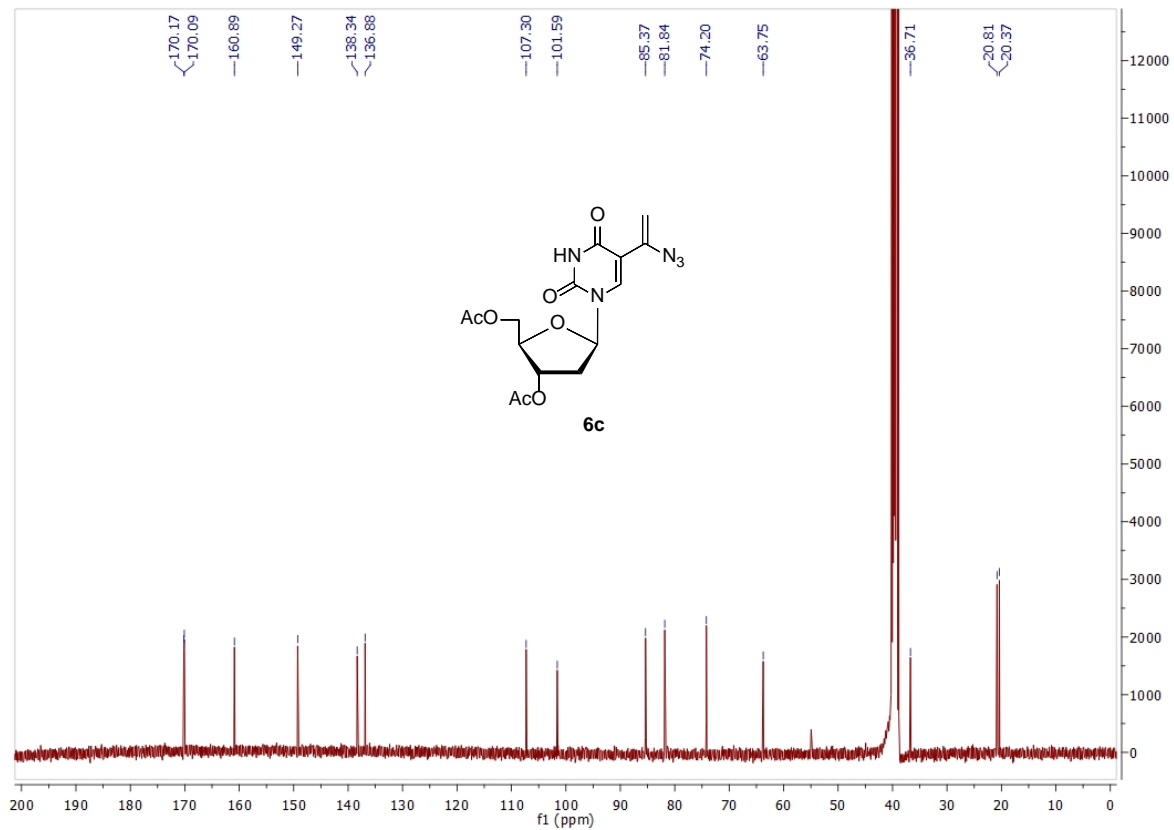



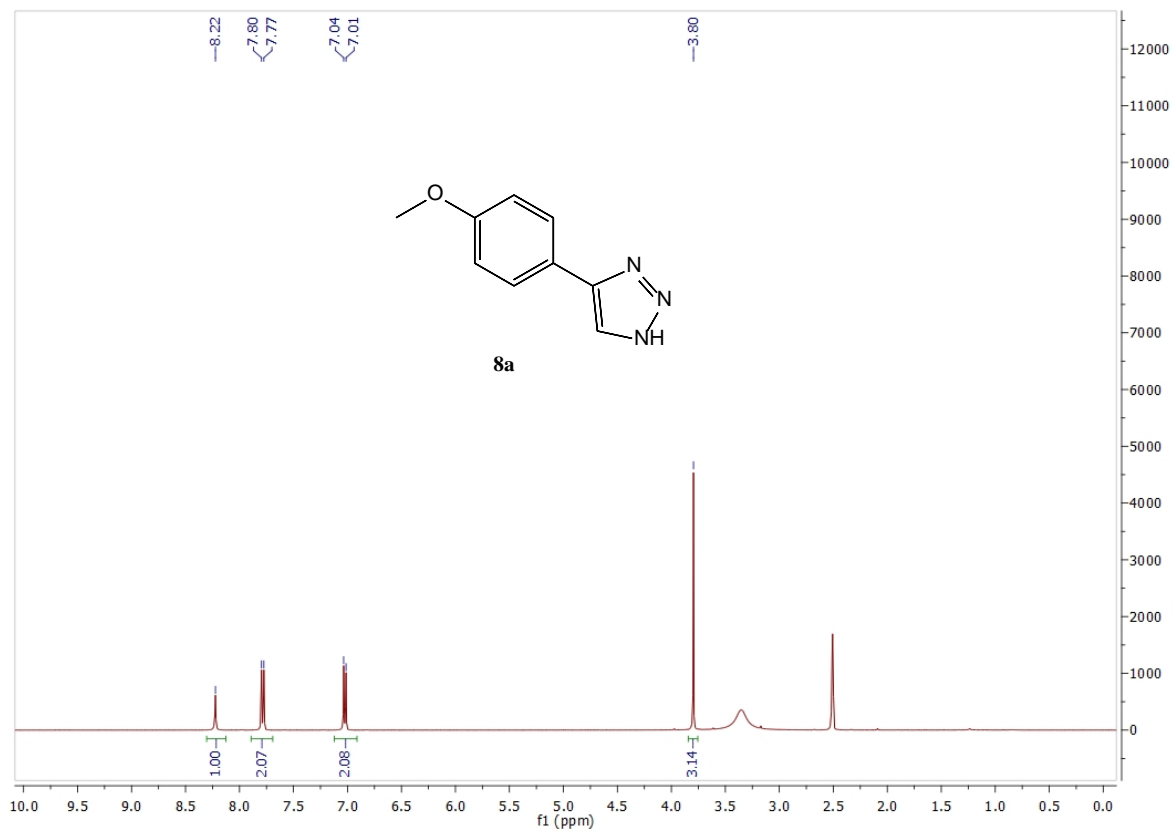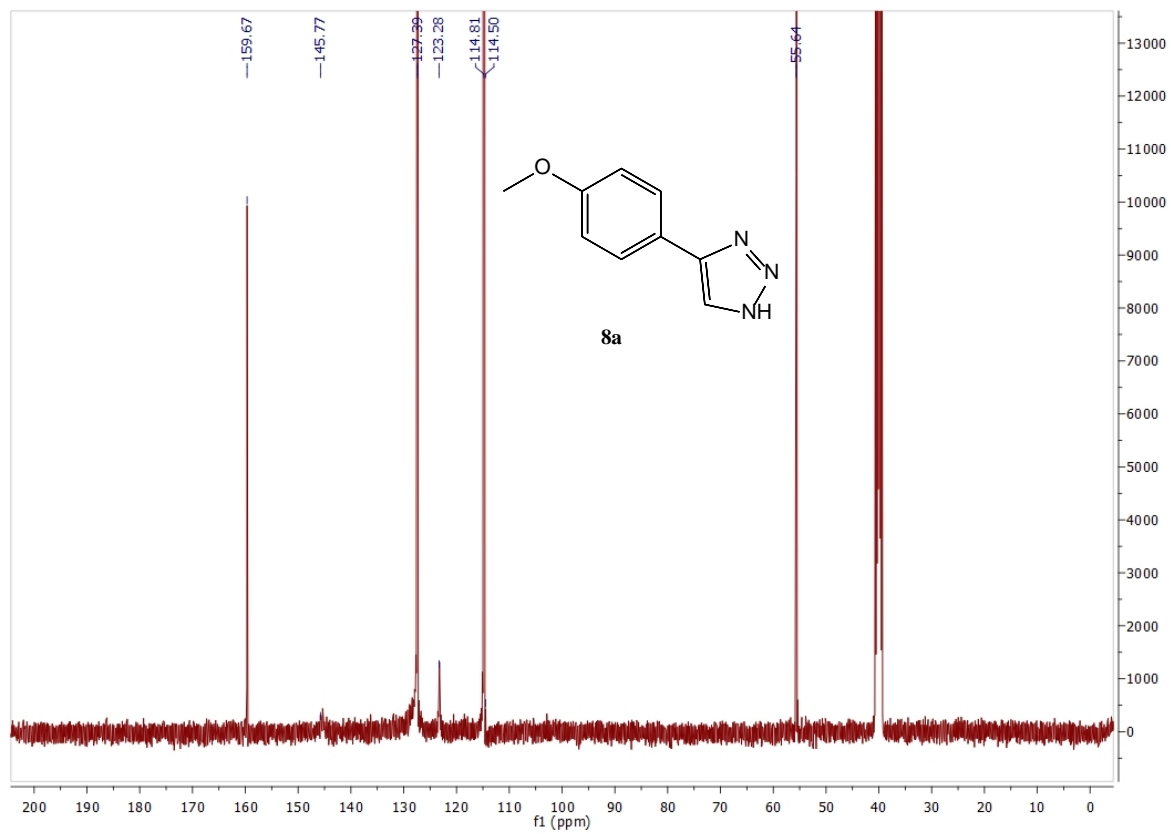

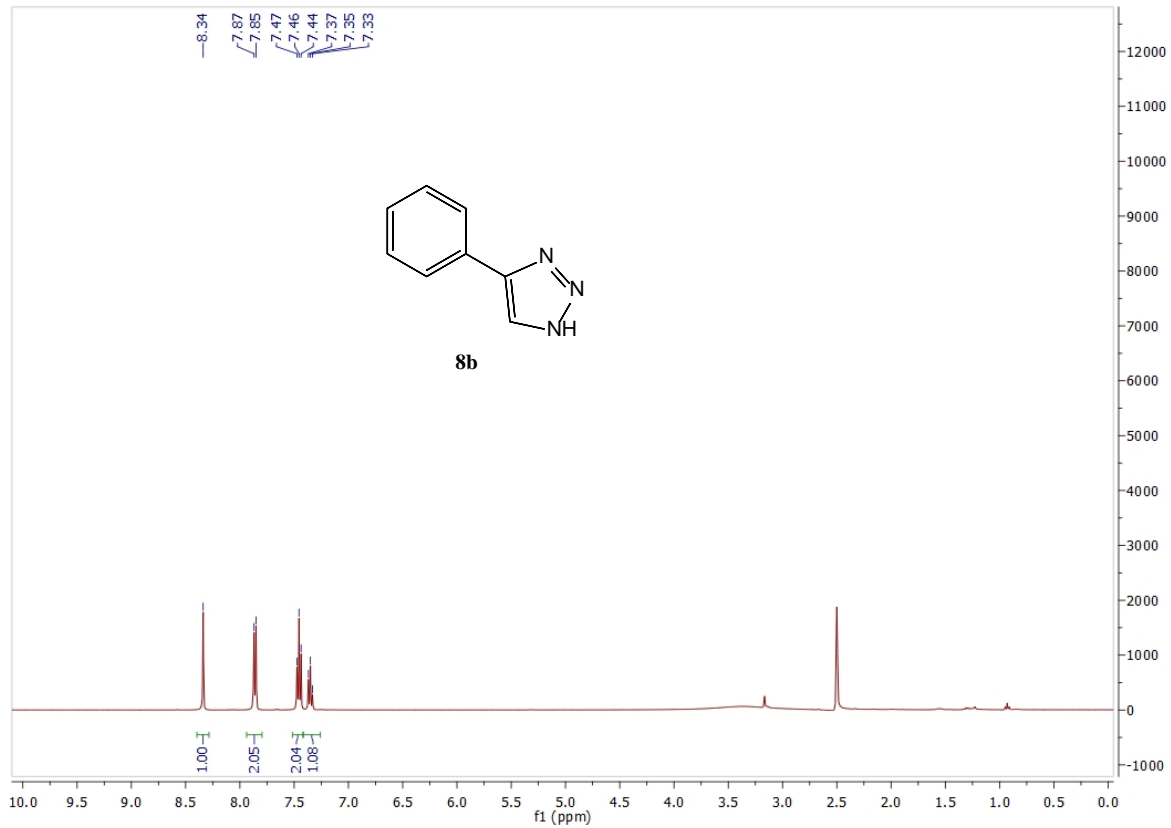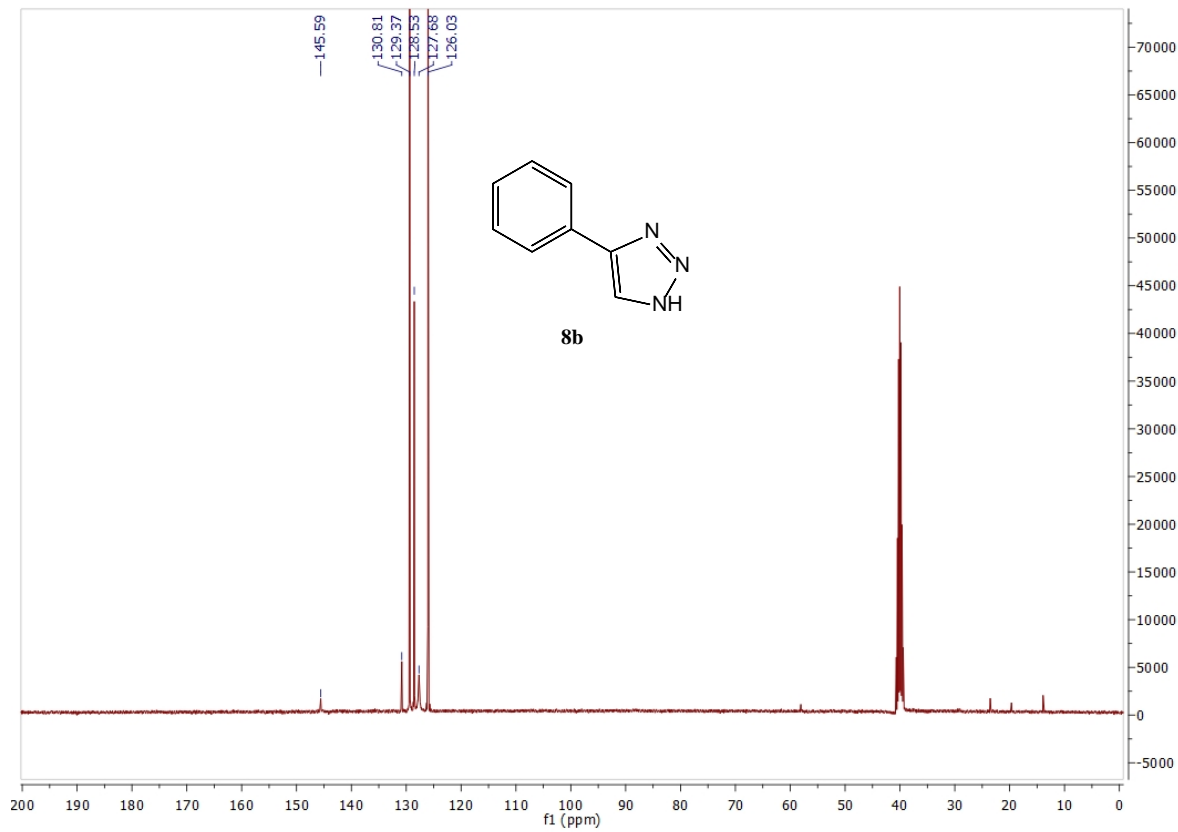

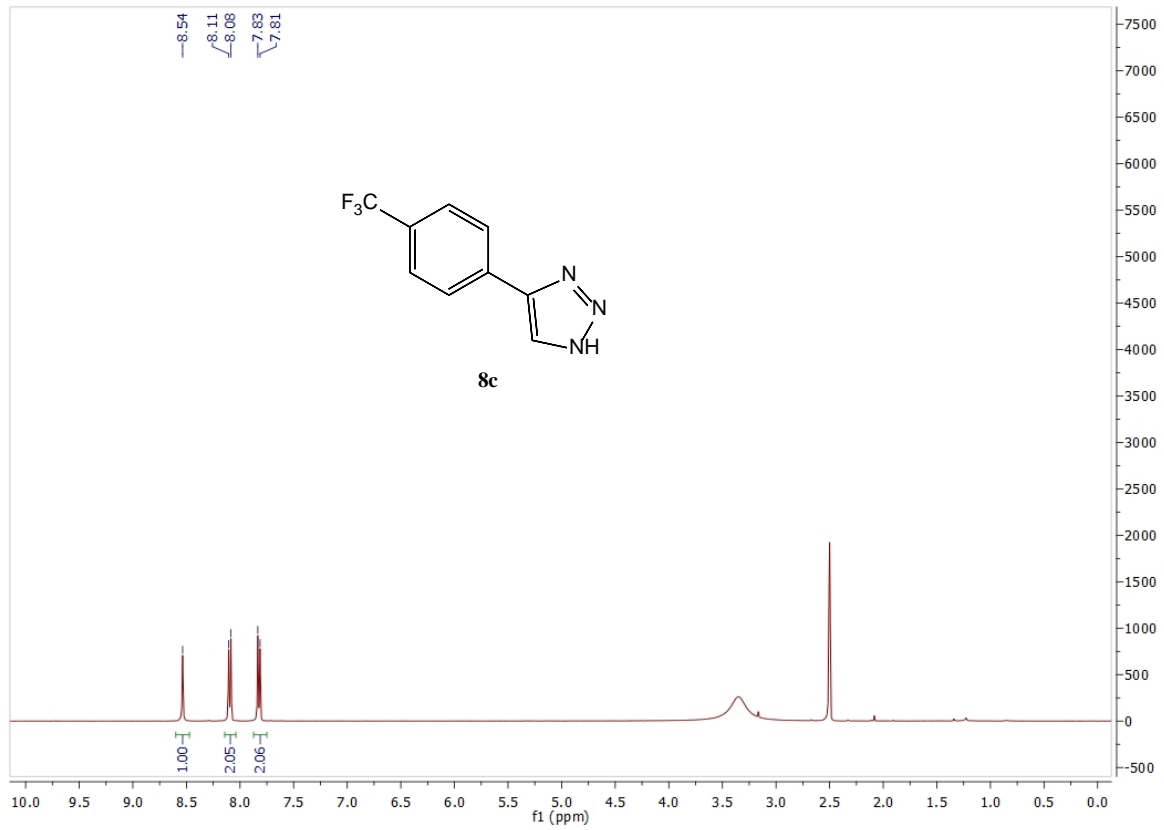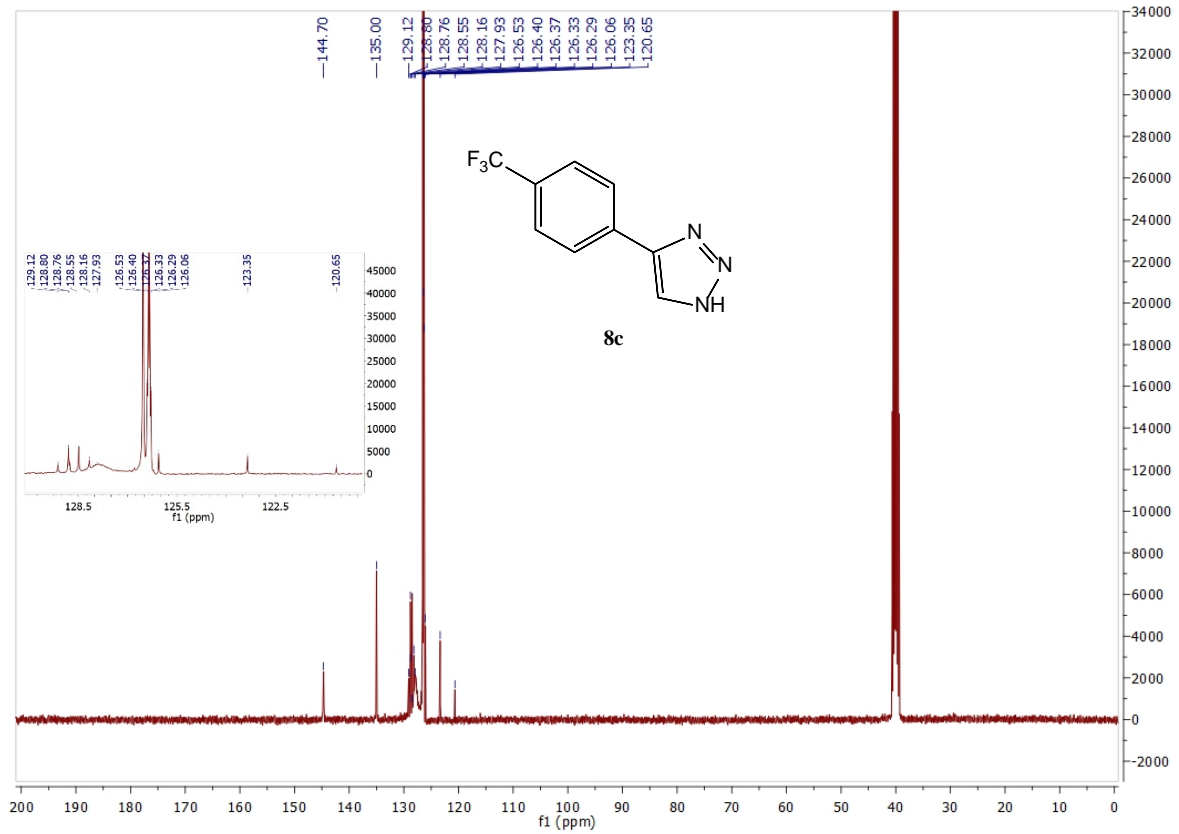

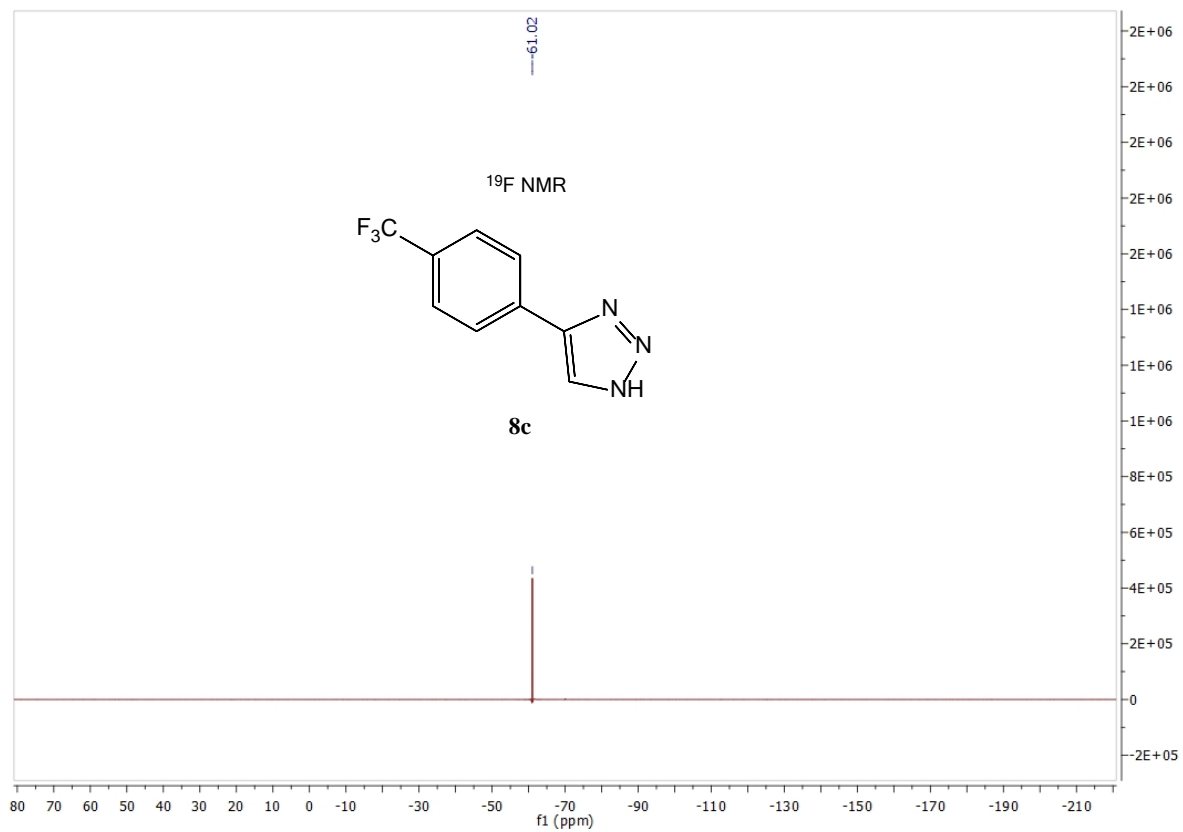

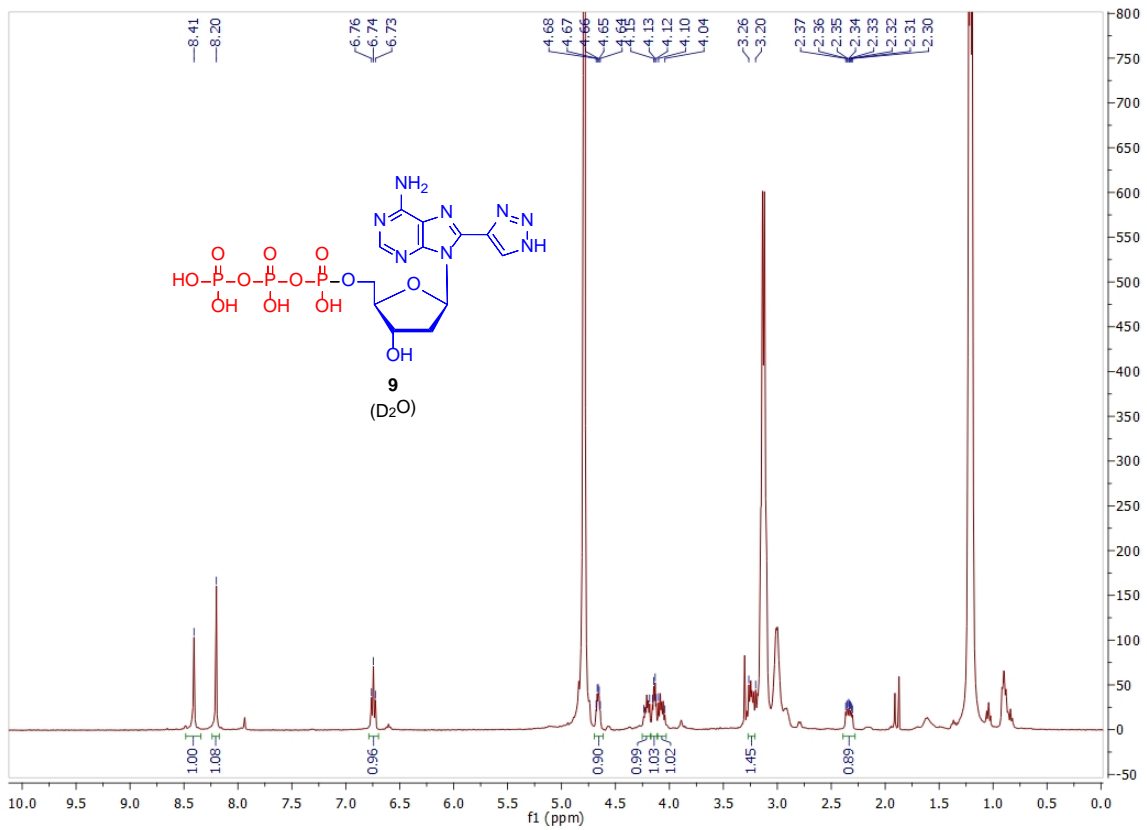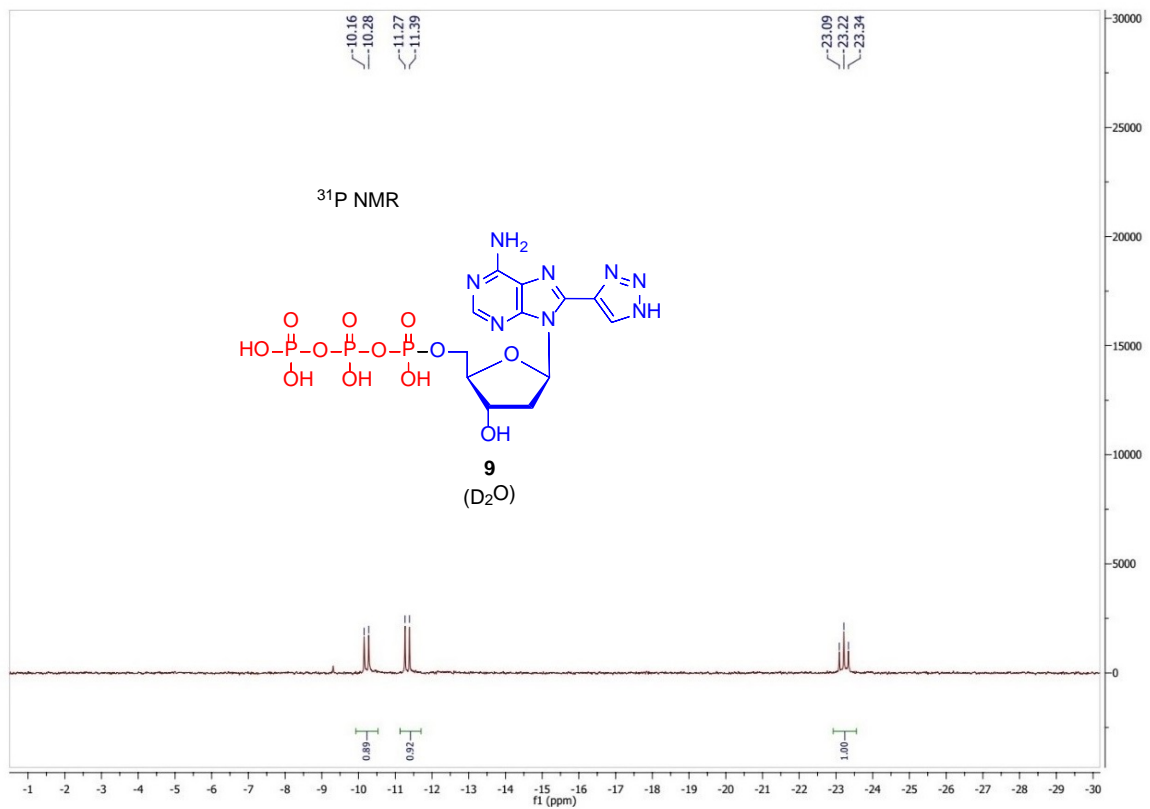

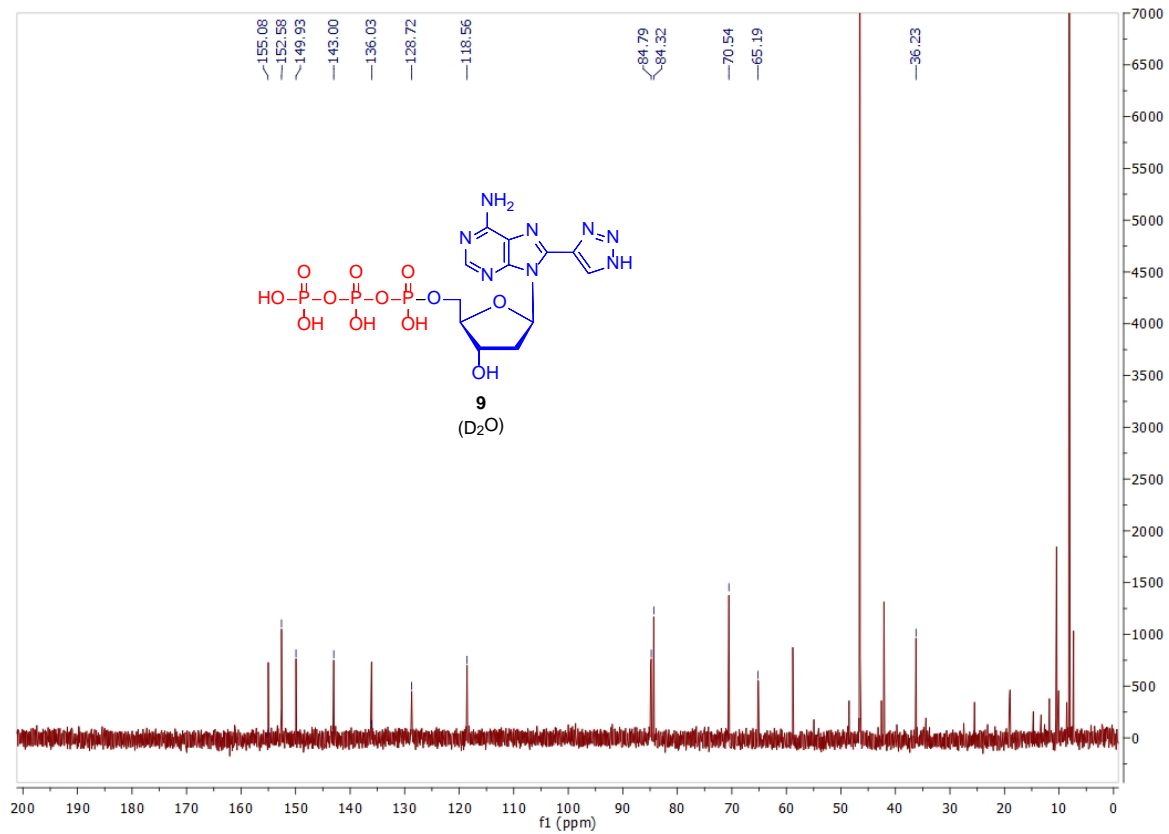

## 5. References

- S1. Zayas, J.; Annoual, M.; Das, J. K.; Felty, Q.; Gonzalez, W. G.; Miksovska, J.; Sharifai, N.; Chiba, A.; Wnuk, S. F., Strain Promoted Click Chemistry of 2- or 8-Azidopurine and 5-Azidopyrimidine Nucleosides and 8-Azidoadenosine Triphosphate with Cyclooctynes. Application to Living Cell Fluorescent Imaging. *Bioconjug. Chem.* **2015**, *26*, 1519-1532.
- S2. Ren, Y.; Lai, Y.; Laverde, E. E.; Lei, R.; Rein, H. L.; Liu, Y., Modulation of trinucleotide repeat instability by DNA polymerase  $\beta$  polymorphic variant R137Q. *PLoS One* **2017**, *12*, e0177299.
- S3. Beaver, J. M.; Lai, Y.; Xu, M.; Casin, A. H.; Laverde, E. E.; Liu, Y., AP endonuclease 1 prevents trinucleotide repeat expansion via a novel mechanism during base excision repair. *Nucleic Acids Res.* **2015**, *43*, 5948-5960.
- S4. Lai, Y.; Weizmann, Y.; Liu, Y., The deoxyribose phosphate lyase of DNA polymerase  $\beta$  suppresses a processive DNA synthesis to prevent trinucleotide repeat instability. *Nucleic Acids Res.* **2018**, *46*, 8940-8952.
